# Supplementary material for: A Multi-Elements Isotope Approach to Assess the Geographic Provenance of Manila Clams (Ruditapes philippinarum) via Recombining Appropriate Elements
Source: MDPI journal article supplement (doi:10.3390/foods10030646), 2021-03-18
Supplement: s1 [file s1]

<Supplementary Materials>

## A Multi-Elements Isotope Approach to Assess the Geographic Provenance of Manila Clams (*Ruditapes philippinarum*) via Recombining Appropriate Elements

Eun-Ji Won, Seung Hee Kim, Young-Shin Go, K. Suresh Kumar, Min-Seob Kim, Suk-Hee Yoon, Germain Bayon, Jung-Hyun Kim, Kyung-Hoon Shin

### Supplementary Figures

|                                                                                                                                                                                                                                                                                                                                                        |   |
|--------------------------------------------------------------------------------------------------------------------------------------------------------------------------------------------------------------------------------------------------------------------------------------------------------------------------------------------------------|---|
| Figure S1. Scatter plots for $\delta^{13}\text{C}$ and $\delta^{15}\text{N}$ values for clam samples collected from China, DPR Korea and Korea .....                                                                                                                                                                                                   | 1 |
| Figure S2. Grouping of Manila clams from three countries based on LDA analysis of $\delta^{13}\text{C}$ , $\delta^{15}\text{N}$ , $\delta^{18}\text{O}$ , and $\delta\text{D}$ . Bold italics indicate the specimens were not well identified by geographic origin .....                                                                               | 2 |
| Figure S3. Grouping of Manila clams from three countries based on LDA analysis of $\delta^{13}\text{C}$ , $\delta^{15}\text{N}$ , $\delta\text{D}$ , and $\delta^{34}\text{S}$ . Bold italics indicate the specimens were not well identified by geographic origin .....                                                                               | 3 |
| Figure S4. Grouping of Manila clams from three countries based on LDA analysis of $\delta^{13}\text{C}$ , $\delta^{15}\text{N}$ , $\delta^{18}\text{O}$ , $\delta\text{D}$ , and $\delta^{34}\text{S}$ . Bold italics indicate the specimens were not well identified by geographic origin .....                                                       | 4 |
| Figure S5. Grouping of Manila clams from three countries based on LDA analysis of $\delta^{13}\text{C}$ , $\delta^{15}\text{N}$ , $\delta\text{D}$ , $\delta^{34}\text{S}$ , and $^{87}\text{Sr}/^{86}\text{Sr}$ . Bold italics indicate the specimens were not well identified by geographic origin .....                                             | 5 |
| Figure S6. Grouping of Manila clams from three countries based on LDA analysis of $\delta^{13}\text{C}$ , $\delta^{15}\text{N}$ , $\delta\text{D}$ , $\delta^{18}\text{O}$ , $\delta^{34}\text{S}$ , and $^{87}\text{Sr}/^{86}\text{Sr}$ . Bold italics indicate the specimens were not well identified by geographic origin .....                     | 6 |
| Figure S7. Grouping of Manila clams from three countries based on LDA analysis of $\delta^{13}\text{C}$ , $\delta^{15}\text{N}$ , $\delta\text{D}$ , $\delta^{18}\text{O}$ , $\delta^{34}\text{S}$ , and $\delta\text{Nd}$ . Bold italics indicate the specimens were not well identified by geographic origin .....                                   | 7 |
| Figure S8. Grouping of Manila clams from three countries based on LDA analysis of $\delta^{13}\text{C}$ , $\delta^{15}\text{N}$ , $\delta\text{D}$ , $\delta^{18}\text{O}$ , $\delta^{34}\text{S}$ , $\delta\text{Nd}$ , and $^{87}\text{Sr}/^{86}\text{Sr}$ . Bold italics indicate the specimens were not well identified by geographic origin ..... | 8 |

\*Corresponding author. E-mail: shinkh@hanyang.ac.kr; Tel.: +82-31-400-5536 (K.-H. Shin).

## Supplementary Figures

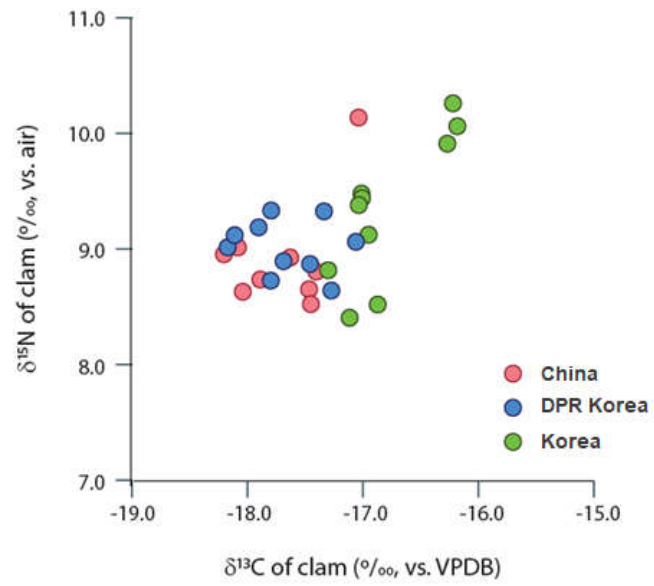

Figure S1. Scatter plots for  $\delta^{13}\text{C}$  and  $\delta^{15}\text{N}$  values for clam samples collected from China, DPR Korea and Korea

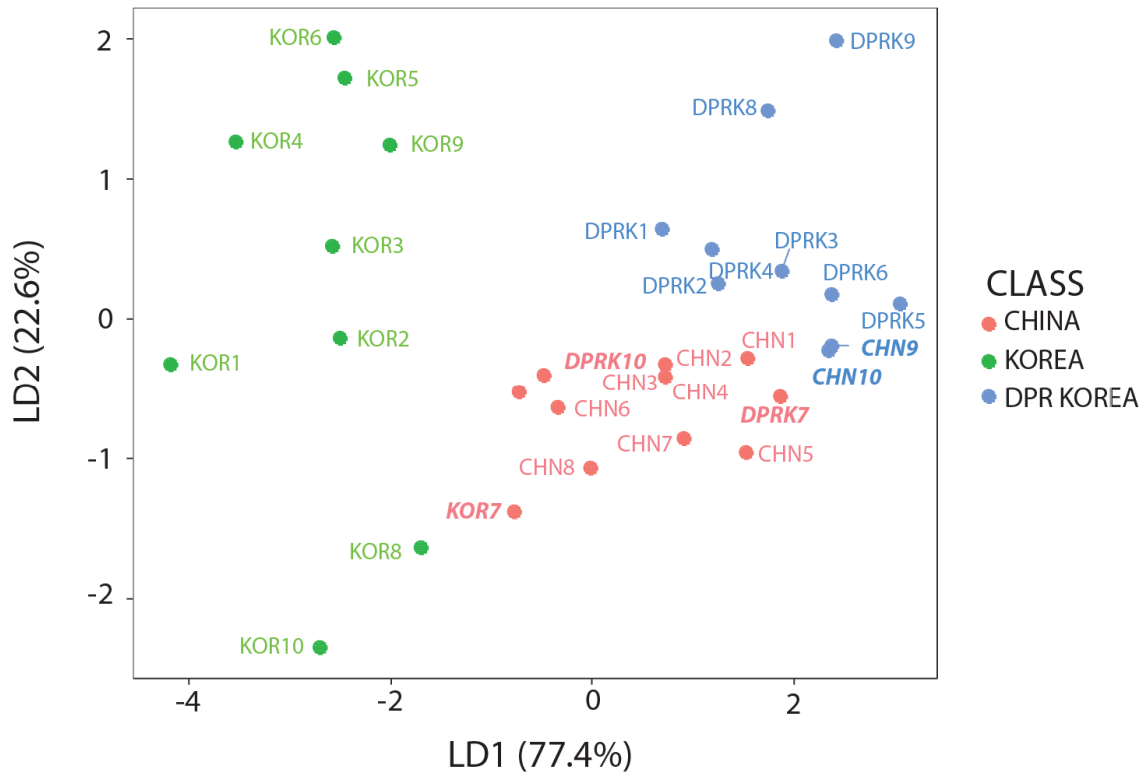

Figure S2. Grouping of Manila clams from three countries based on LDA analysis of  $\delta^{13}\text{C}$ ,  $\delta^{15}\text{N}$ ,  $\delta^{18}\text{O}$ , and  $\delta\text{D}$ . Bold italics indicate the specimens were not well identified by geographic origin

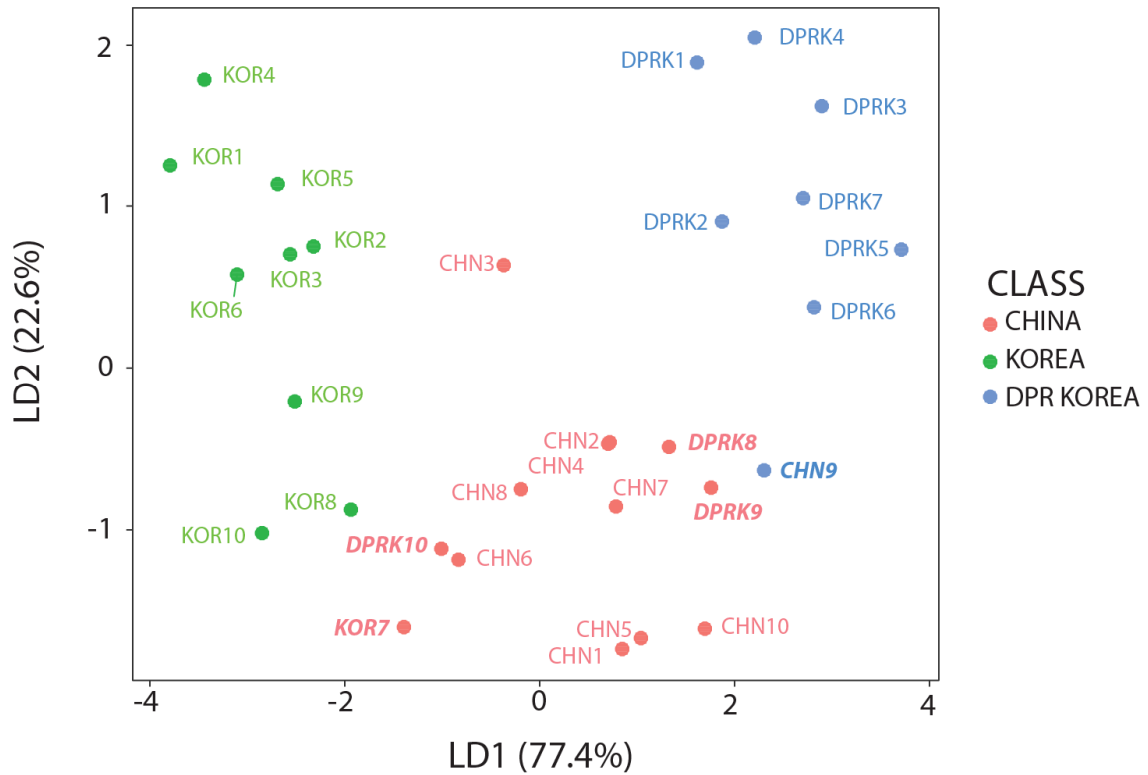

Figure S3. Grouping of Manila clams from three countries based on LDA analysis of  $\delta^{13}\text{C}$ ,  $\delta^{15}\text{N}$ ,  $\delta\text{D}$ ,  $\delta^{34}\text{S}$ . Bold italics indicate the specimens were not well identified by geographic origin

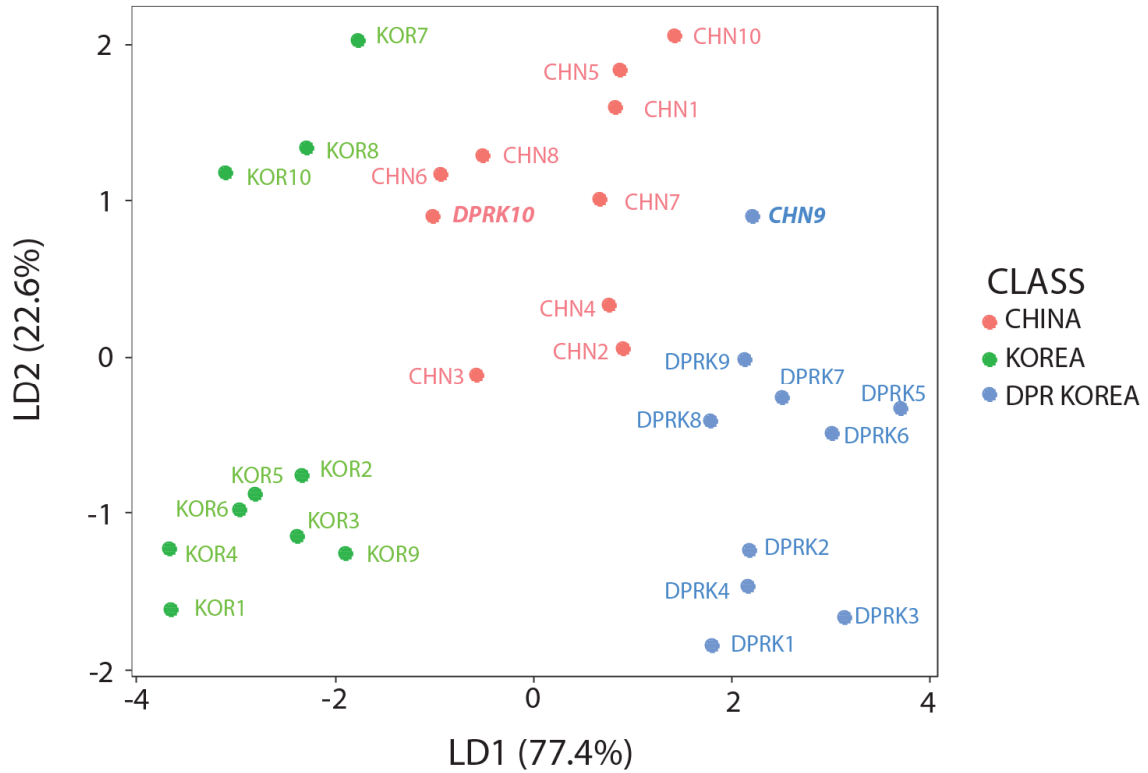

Figure S4. Grouping of Manila clams from three countries based on LDA analysis of  $\delta^{13}\text{C}$ ,  $\delta^{15}\text{N}$ ,  $\delta^{18}\text{O}$ ,  $\delta\text{D}$ , and  $\delta^{34}\text{S}$ . Bold italics indicate the specimens were not well identified by geographic origin

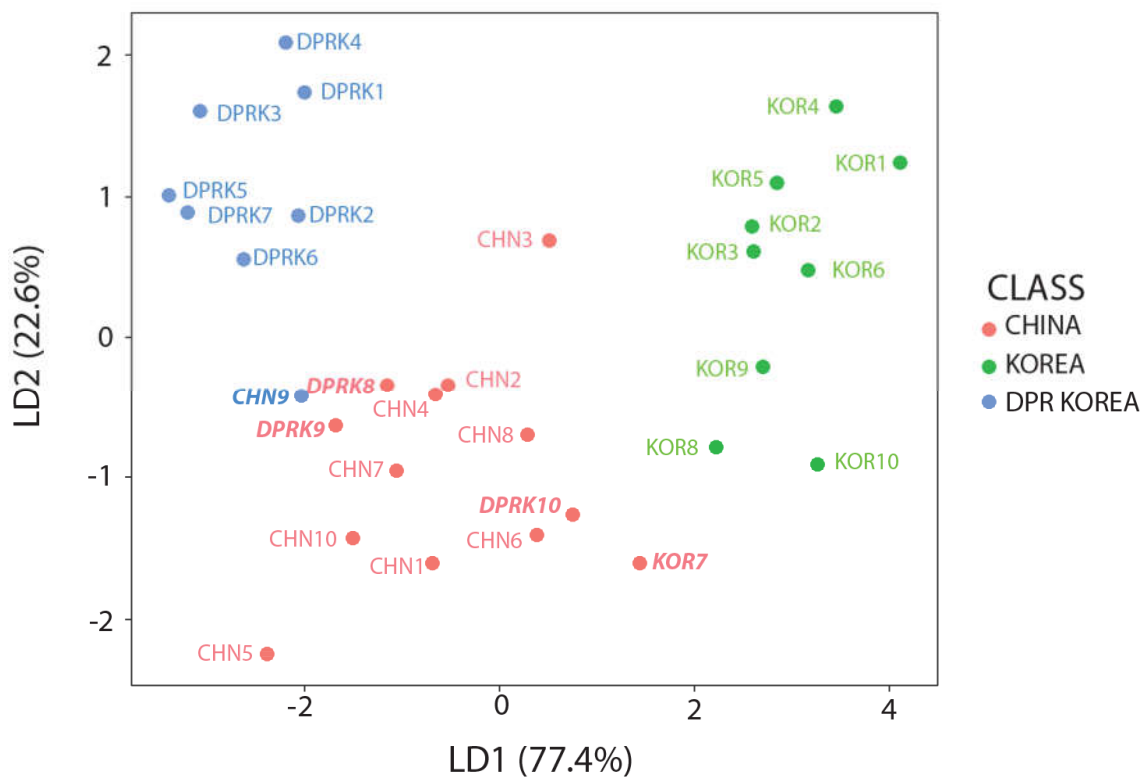

Figure S5. Grouping of Manila clams from three countries based on LDA analysis of  $\delta^{13}\text{C}$ ,  $\delta^{15}\text{N}$ ,  $\delta\text{D}$ ,  $\delta^{34}\text{S}$ , and  $^{87}\text{Sr}/^{86}\text{Sr}$ . Bold italics indicate the specimens were not well identified by geographic origin

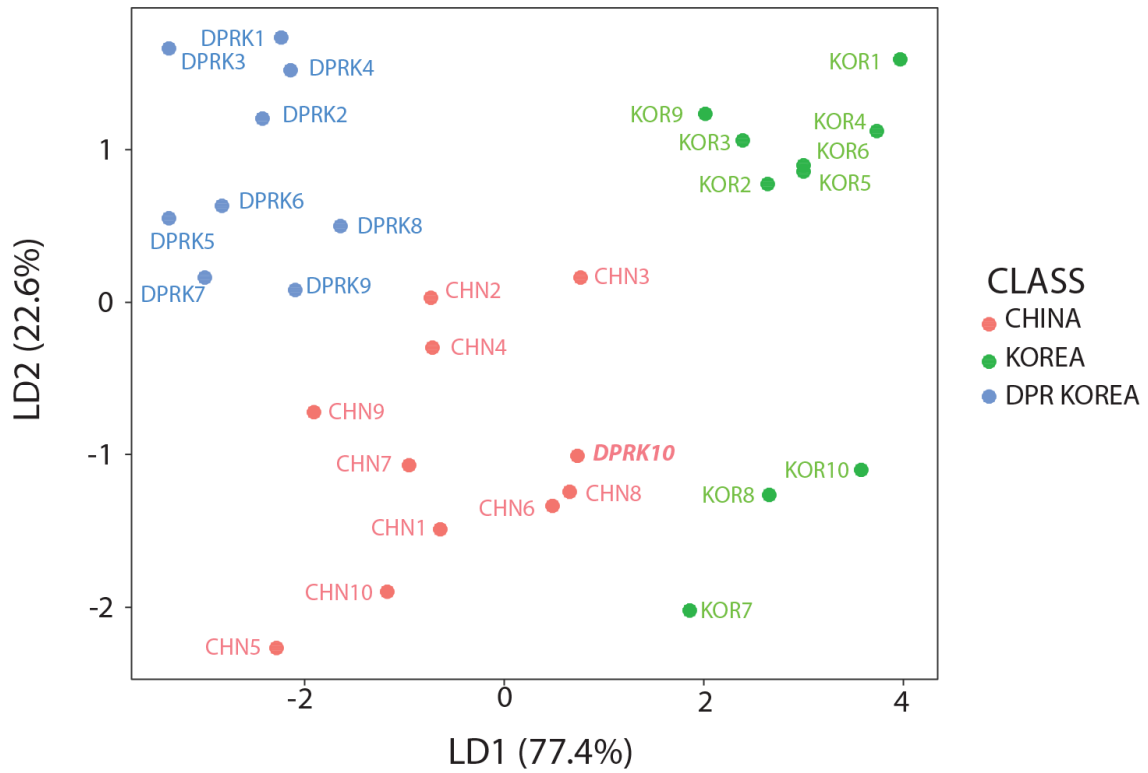

Figure S6. Grouping of Manila clams from three countries based on LDA analysis of  $\delta^{13}\text{C}$ ,  $\delta^{15}\text{N}$ ,  $\delta\text{D}$ ,  $\delta^{18}\text{O}$ ,  $\delta^{34}\text{S}$ , and  $^{87}\text{Sr}/^{86}\text{Sr}$ . Bold italics indicate the specimens were not well identified by geographic origin

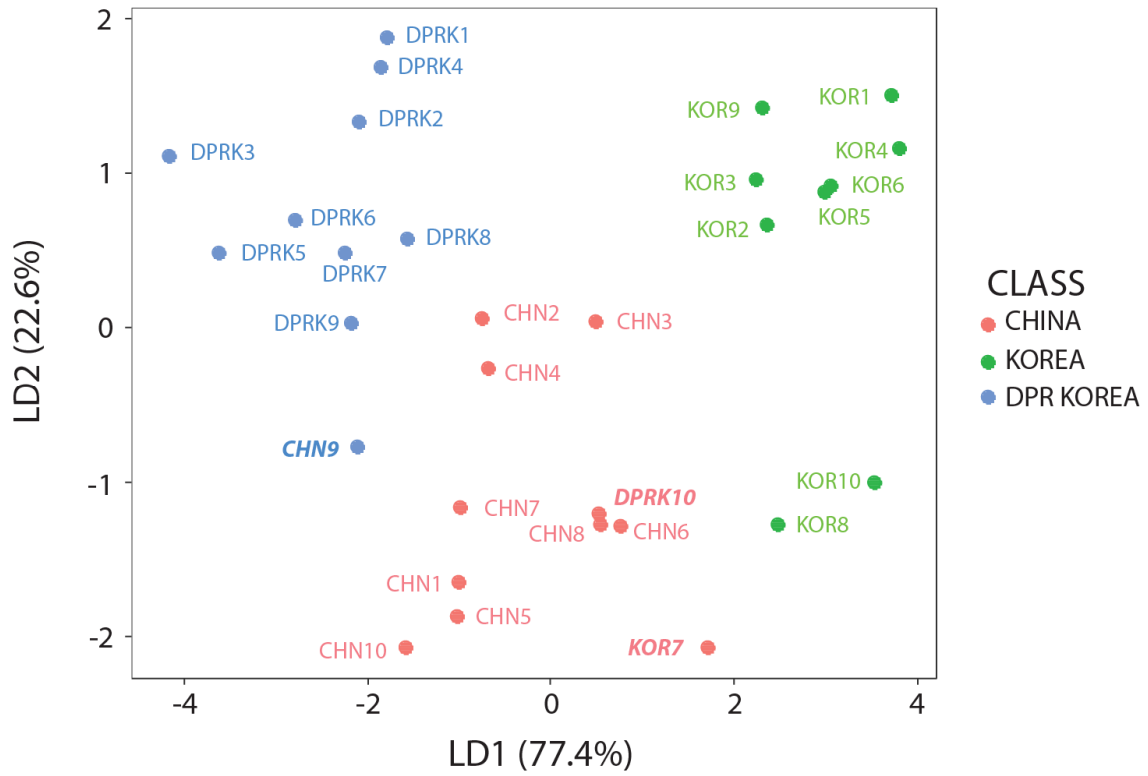

Figure S7. Grouping of Manila clams from three countries based on LDA analysis of  $\delta^{13}\text{C}$ ,  $\delta^{15}\text{N}$ ,  $\delta\text{D}$ ,  $\delta^{18}\text{O}$ ,  $\delta^{34}\text{S}$ , and  $\epsilon\text{Nd}$ . Bold italics indicate the specimens were not well identified by geographic origin



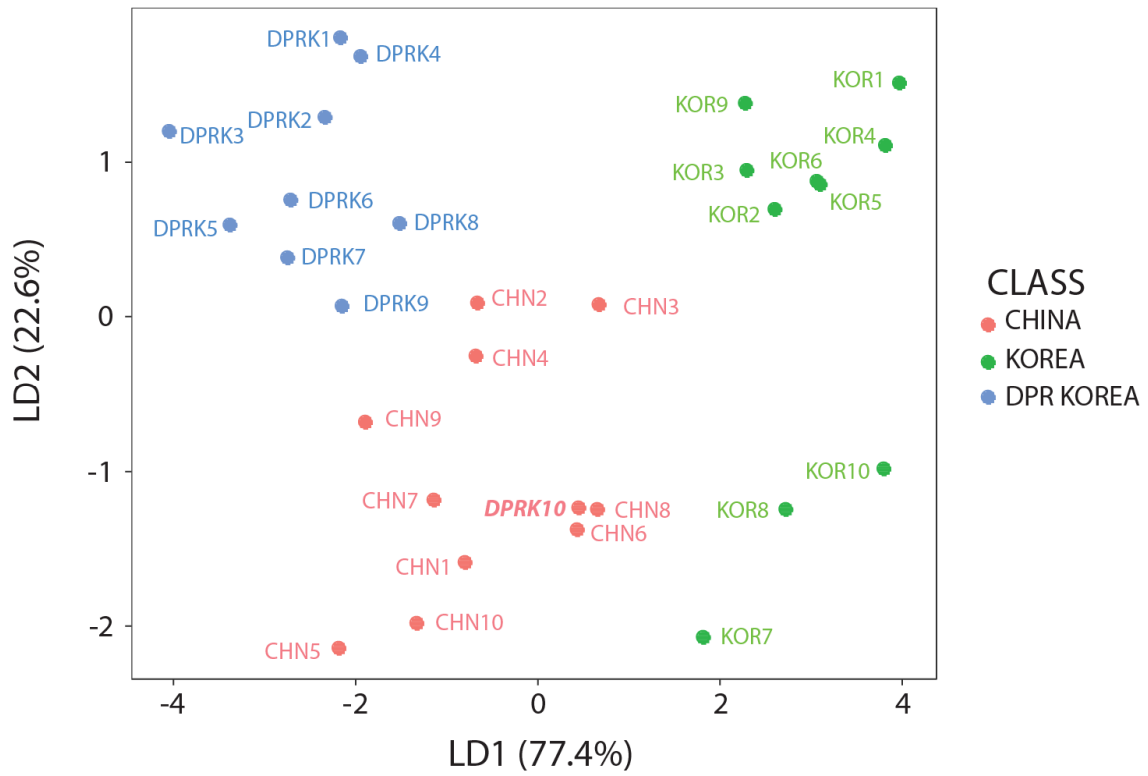

Figure S8. Grouping of Manila clams from three countries based on LDA analysis of  $\delta^{13}\text{C}$ ,  $\delta^{15}\text{N}$ ,  $\delta\text{D}$ ,  $\delta^{18}\text{O}$ ,  $\delta^{34}\text{S}$ ,  $\epsilon\text{Nd}$ , and  $^{87}\text{Sr}/^{86}\text{Sr}$ . Bold italics indicate the specimens were not well identified by geographic origin
